# Supplementary material for: Mussel-Inspired Surface Modification of α-Zirconium Phosphate Nanosheets for Anchoring Efficient and Reusable Ultrasmall Au Nanocatalysts
Source: MDPI journal article supplement (doi:10.3390/nano12193339), 2022-09-25
Supplement: s1 [file s1]

# Supporting Information

## Mussel-Inspired Surface Modification of $\alpha$ -Zirconium Phosphate Nanosheets for Anchoring Efficient and Reusable Ultrasmall Au Nanocatalysts

Limiao Lin<sup>1,†</sup>, Yi Wen<sup>2,†</sup>, Lixi Li<sup>2</sup>, Ying Tan<sup>2</sup>, Peng Yang<sup>2</sup>, Yaoheng Liang<sup>2</sup>,

Yisheng Xu<sup>2</sup>, Huawen Hu<sup>2,\*</sup>, Yonghang Xu<sup>2,\*</sup>

<sup>1</sup>*School of Environmental and Chemical Engineering, Foshan University, Foshan 528000, China*

<sup>2</sup>*School of Materials Science and Hydrogen Energy, Foshan University, Foshan 528000, China*

<sup>†</sup>These authors contributed equally to this work.

\*Corresponding authors: *huawenhu@126.com (H.H.);*

*yonghangxu@fosu.edu.cn (Y.X.)*

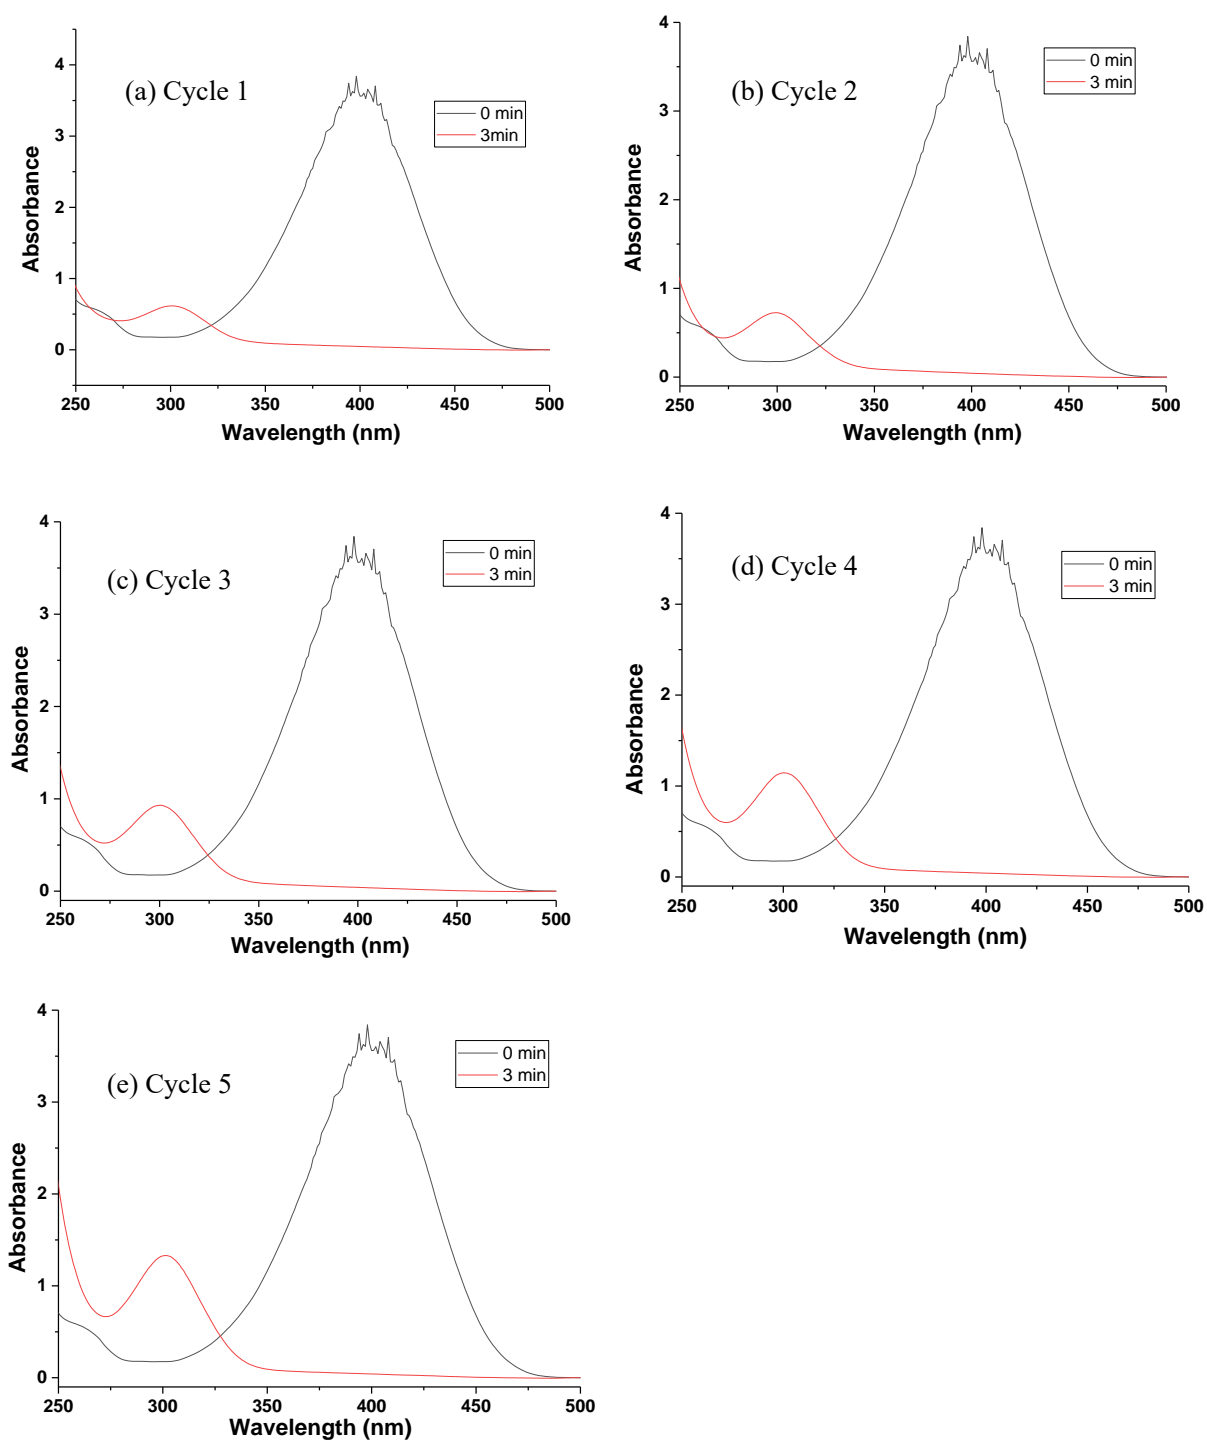

**Figure S1.** UV-vis absorption spectra of the reduction of 4-NP in the reusability experiments.
